# Supplementary material for: Citrate-Mediated Acyl-CoA Synthesis Is Required for the Promotion of Growth and Triacylglycerol Production in Oleaginous Yeast Lipomyces starkeyi
Source: MDPI journal article supplement (doi:10.3390/microorganisms9081693), 2021-08-09
Supplement: s1 [file s1]

## Supplementary data

# Citrate-Mediated Acyl-CoA Synthesis Is Required for the Promotion of Growth and Triacylglycerol Production in Oleaginous Yeast *Lipomyces Starkeyi*

Rikako Sato <sup>1</sup>, Satoshi Ara <sup>1</sup>, Harutake Yamazaki <sup>1</sup>, Koji Ishiya <sup>2</sup>, Sachiyo Aburatani <sup>3,\*</sup>  
and Hiroaki Takaku <sup>1,\*</sup>

<sup>1</sup> Department of Applied Life Sciences, Niigata University of Pharmacy and Applied Life Sciences, Niigata 956-8603, Japan; sato.rikako03@gmail.com (R.S.); ara@nupals.ac.jp (S.A.); hyamazaki@nupals.ac.jp (H.Y.)

<sup>2</sup> Bioproduction Research Institute (BPRI), National Institute of Advanced Industrial Science and Technology (AIST), Sapporo 062-8517, Japan; koji.ishiya@aist.go.jp

<sup>3</sup> Computational Bio Big-Data Open Innovation Laboratory (CBBDOIL), National Institute of Advanced Industrial Science and Technology (AIST), Tokyo 135-0064, Japan

\* Correspondence: s.aburatani@aist.go.jp (S.A.); htakaku@nupals.ac.jp (H.T.); Tel.: +81-3-35998712 (S.A.); +81-250-255119 (H.T.)

## Supplementary Table

**Table S1.** Microbial strains used in this study

| Strain name                                | Relevant genotype                                                                                                                                          | Parental strain | Source of reference                     |
|--------------------------------------------|------------------------------------------------------------------------------------------------------------------------------------------------------------|-----------------|-----------------------------------------|
| <i>Lipomyces starkeyi</i><br>CBS1807       |                                                                                                                                                            |                 | Centraalbureau voor<br>Schimmelcultures |
| sr22                                       |                                                                                                                                                            | CBS1807         | This study                              |
| $\Delta$ slig4                             | $\Delta$ slig4::P <sub>TDH3</sub> -Sh ble-T <sub>TDH3</sub>                                                                                                | CBS1807         | [16]                                    |
| $\Delta$ slig4 $\Delta$ acl1 $\Delta$ acl2 | $\Delta$ slig4::P <sub>TDH3</sub> -Sh ble-T <sub>TDH3</sub><br>$\Delta$ acl1 $\Delta$ acl2::P <sub>TDH3</sub> -hph-T <sub>TDH3</sub>                       | $\Delta$ slig4  | This study                              |
| $\Delta$ slig4/ACL1ACL2                    | $\Delta$ slig4::P <sub>TDH3</sub> -ACL1-T <sub>TDH3</sub> -P <sub>ACT1</sub> -<br>sNAT1-T <sub>ACT1</sub> -P <sub>TDH3</sub> -ACL2-T <sub>TDH3</sub>       | $\Delta$ slig4  | This study                              |
| sr22/ACL1ACL2                              | $\Delta$ slig4::P <sub>TDH3</sub> -ACL1-T <sub>TDH3</sub> -P <sub>ACT1</sub> -<br>sNAT1-T <sub>ACT1</sub> -P <sub>TDH3</sub> -ACL2-T <sub>TDH3</sub>       | sr22            | This study                              |
| <i>Escherichia coli</i><br>HST08           | F <sup>-</sup> , endA1, supE44, thi-1, recA1,<br>relA1, gyrA96, phoA,<br>Φ80dlacZΔM15, Δ(lacZYA-<br>argF)U169, Δ(mrr-hsdRMSmcBC),<br>ΔmcrA, λ <sup>-</sup> |                 | TaKaRa Bio                              |

**Table S2.** List of primers and primer sequences used for quantitative real time PCR and southern bot analysis in this study

| Primer             | Primer Sequence (5'-3')   | Reference  |
|--------------------|---------------------------|------------|
| ACL1 Fw            | GCCAAGAATGCCGCCATGAA      | [25]       |
| ACL1 Rv            | GCTCGGGCTTCGGAACAATG      | [25]       |
| ACL2 Fw            | GTGGTATCGCGAACTTCACACAG   | [25]       |
| ACL2 Rv            | GGTGGAGTTGGGACTGGTAGTC    | [25]       |
| FAS1 Fw            | TCAACTGGGAGCAAGCCACA      | [25]       |
| FAS1 Rv            | TGACACGGACACCAGTTCCC      | [25]       |
| FAS2 Fw            | GATGGAGCCTGTTTTTCGCGG     | [25]       |
| FAS2 Rv            | GCGAATCTCGGACGTCTGGA      | [25]       |
| ACS1 Fw            | ACTACTGACGAAGGTCGACGTG    | This study |
| ACS1 Rv            | ACATCGGGACAGTTCTTCAGGG    | This study |
| 18S rRNA Fw        | GGTAATCTTGTGAAACTCCGTCGTG | [25]       |
| 18S rRNA Rv        | CAAGCTGATGACTTGCGCTTACTAG | [25]       |
| ACL1ACL2-probe-Fw2 | CCCATGTTCGTCATGTTG        | This study |

|                       |                     |            |
|-----------------------|---------------------|------------|
| ACL1ACL2-probe-Rv2    | TTCGATGACTGAGCGATC  | This study |
| LsLIG4-5'UTR-out-Fw   | CTGGCCATCAGACAAGTG  | This study |
| LsLIG4-3'UTR-out-Rv   | GAGTATCCACGCTCACATC | This study |
| LsLIG4-5'UTR-probe-Fw | CCCATGTTCGTCATGTTG  | This study |
| LsLIG4-5'UTR-probe-Rv | TTCGATGACTGAGCGATC  | This study |

**Table S3.** Comparison of the lipid droplet diameter of wild-type and mutants in the screening

| Strain name and No | The counted cell number | The number of cells with lipid droplet smaller than 2 $\mu$ m in lipid droplet diameter | The percentage of cells with lipid droplet smaller than 2 $\mu$ m in lipid droplet diameter |
|--------------------|-------------------------|-----------------------------------------------------------------------------------------|---------------------------------------------------------------------------------------------|
| WT                 | 50                      | 1                                                                                       | 2                                                                                           |
| 1                  | 50                      | 1                                                                                       | 2                                                                                           |
| 2                  | 50                      | 2                                                                                       | 4                                                                                           |
| 3                  | 50                      | 9                                                                                       | 18                                                                                          |
| 4                  | 50                      | 3                                                                                       | 6                                                                                           |
| 5                  | 50                      | 4                                                                                       | 8                                                                                           |
| 6                  | 50                      | 3                                                                                       | 6                                                                                           |
| 7                  | 50                      | 7                                                                                       | 14                                                                                          |
| 8                  | 50                      | 5                                                                                       | 10                                                                                          |
| 9                  | 50                      | 5                                                                                       | 10                                                                                          |
| 10                 | 50                      | 50                                                                                      | 100                                                                                         |
| 11                 | 50                      | 50                                                                                      | 100                                                                                         |
| 12                 | 50                      | 50                                                                                      | 100                                                                                         |
| 13                 | 50                      | 2                                                                                       | 4                                                                                           |
| 14                 | 50                      | 2                                                                                       | 4                                                                                           |
| 15                 | 50                      | 1                                                                                       | 2                                                                                           |
| 16                 | 50                      | 50                                                                                      | 100                                                                                         |
| 17                 | 50                      | 44                                                                                      | 88                                                                                          |
| 18                 | 50                      | 1                                                                                       | 2                                                                                           |
| 19                 | 50                      | 1                                                                                       | 2                                                                                           |
| 20                 | 50                      | 3                                                                                       | 6                                                                                           |
| 21                 | 50                      | 50                                                                                      | 100                                                                                         |
| 22                 | 50                      | 50                                                                                      | 100                                                                                         |

|    |    |    |     |
|----|----|----|-----|
| 23 | 50 | 1  | 2   |
| 24 | 50 | 50 | 100 |
| 25 | 50 | 1  | 2   |

---

## Supplementary Figures

A)

Disruption of *ACL1* and *ACL2*

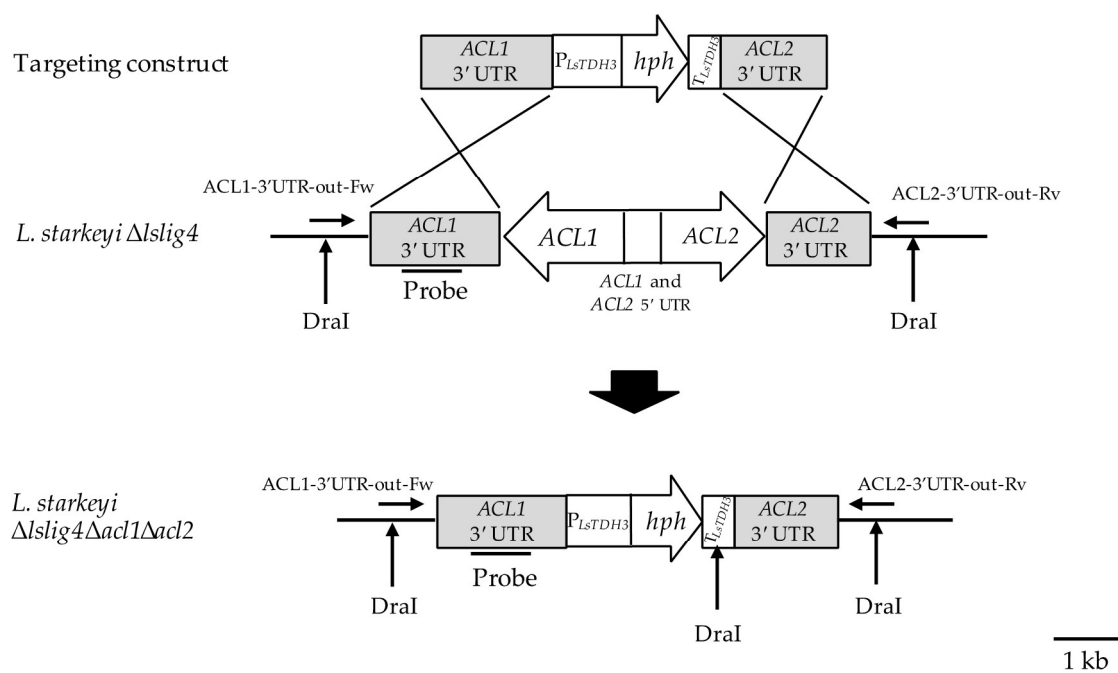

B)

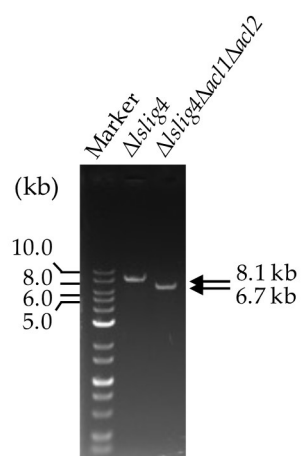

C)

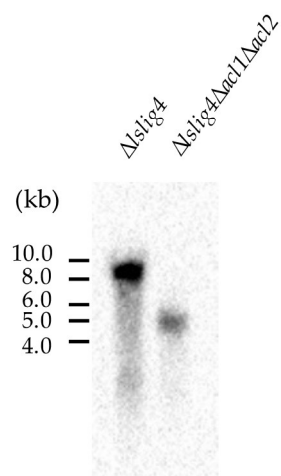

D)

High expression of *ACL1* and *ACL2*

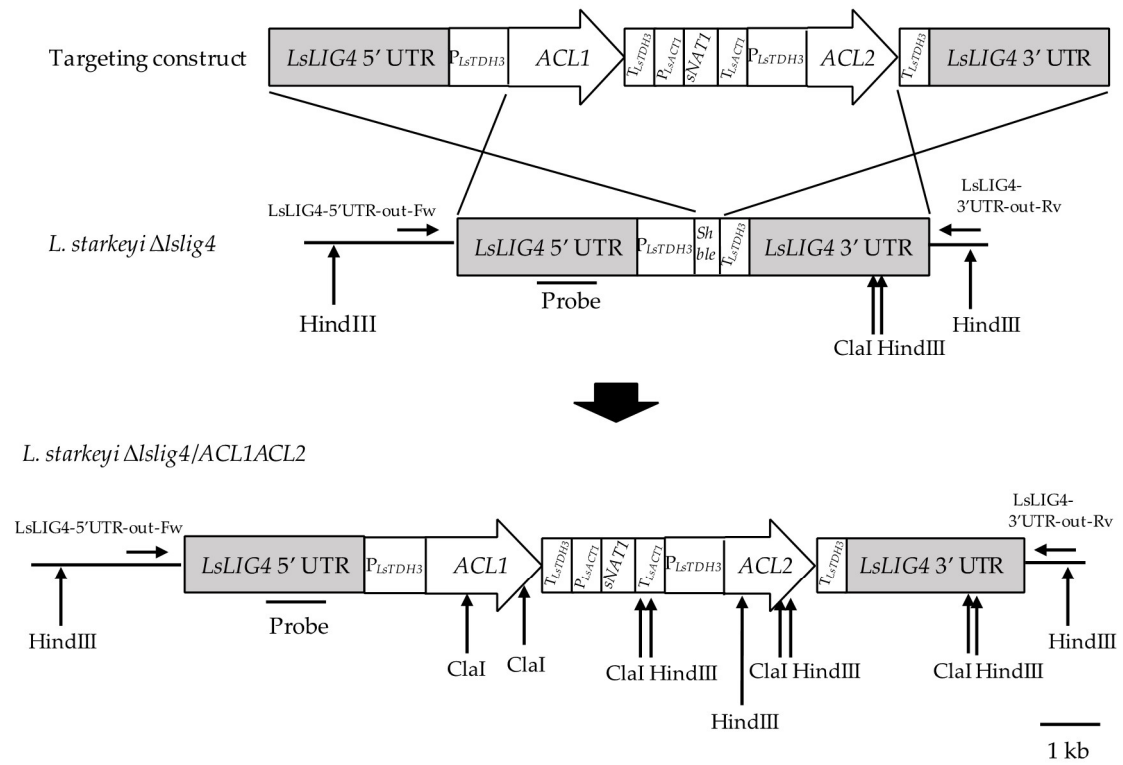

E)

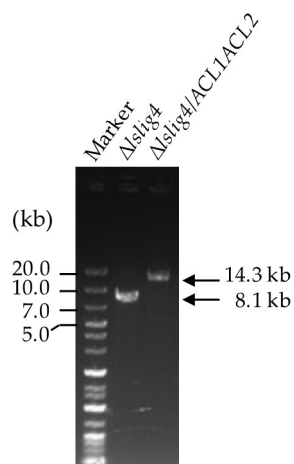

F)

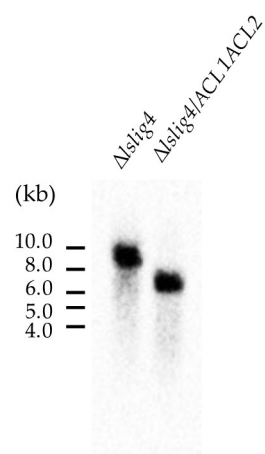

G)

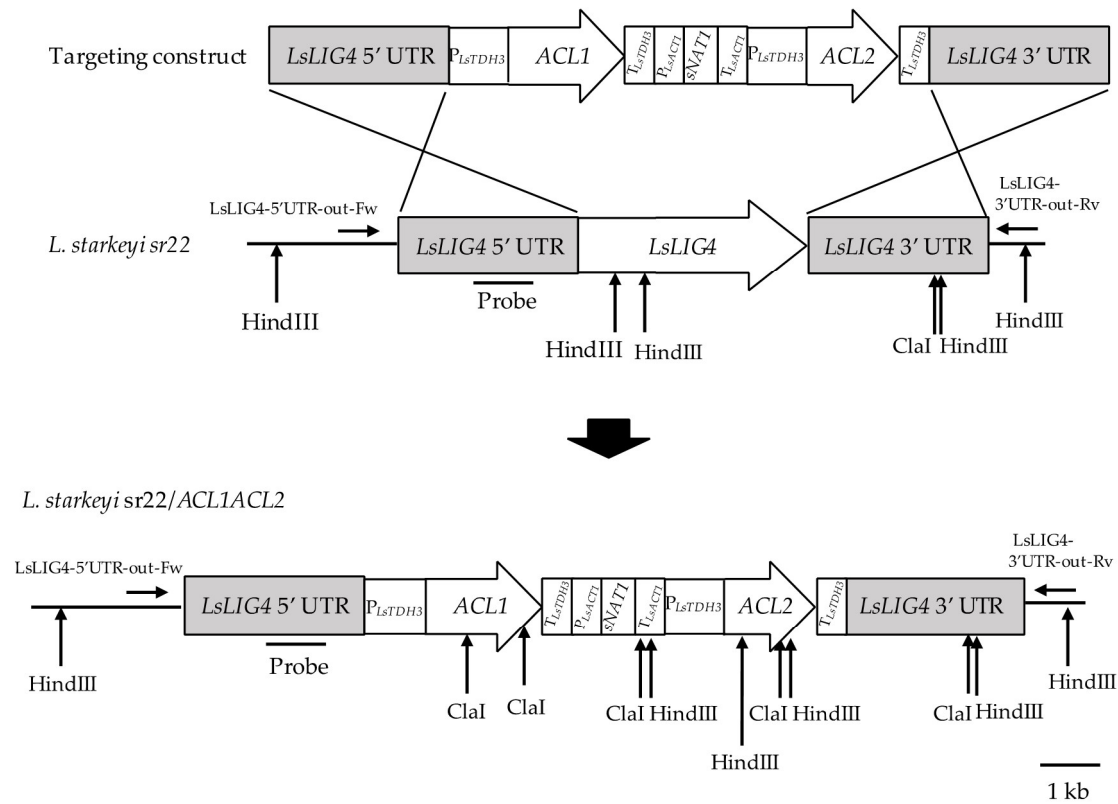

H)

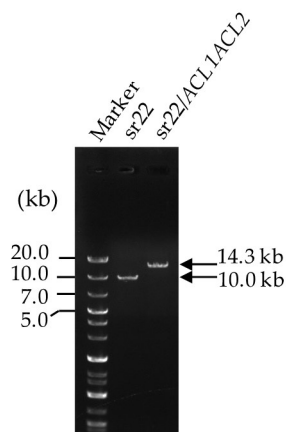

I)

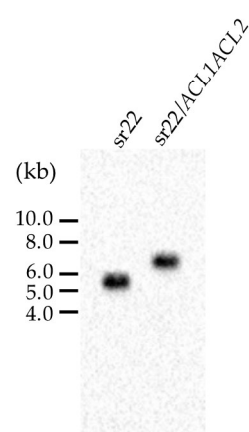

**Figure S1.** PCR and Southern blot confirmations of *ACL1* and *ACL2* deletion or high-expression. A) Strategy of the PCR and Southern blot analysis for the verification of the disruption of *ACL1* and *ACL2* in  $\Delta$ *slig4*. B) Confirmation of the replacement of the *ACL1* and *ACL2* ORF region by the *LsTDH3* promoter/*hph* ORF region/*LsTDH3* terminator DNA

fragment by PCR. The cultured cells on YPD agar plate containing 100 µg/mL hygromycin B was suspended with 100 µL of Lysing buffer containing 2% Triton X-100 and 1% SDS. The resultant cells were added 100 µL of phenol-chloroform after incubated 30 min at 70°C. After centrifugation at 15,000 × g for 5 min at room temperature, the supernatant was used as a template. PCR amplification was performed with primer set ACL1-3'UTR-out-Fw/ACL2-3'UTR-out-Rv and showed distinct bands representing different sizes 8.1 and 6.7 kb. The replacement event results in a 6.7-kb PCR product. C) genomic DNA of the indicated strains was digested with DraI, separated on 0.6% agarose gel, transferred to the Nylon membrane (BIODYNE B, Nihon Pall, Tokyo, Japan), and hybridized with the amplified specific probe (3' UTR region of *ACL1*) using primer set ACL1ACL2-probe-Fw2/ACL1ACL2-probe-Rv2 in panel A). The *ACL1* and *ACL2::hph* fragment was detected by a 5.0 kb band, as opposed to a 8.8 kb band of the *ACL1* and *ACL2* genomic DNA fragment. D, G) Strategy of the PCR and Southern blot analysis for the verification of the high-expression of *ACL1* and *ACL2* in  $\Delta$ *slig4* or *sr22*. E, H) Confirmation of the replacement of the *ACL1/LsTDH3* terminator/*LsACT1* promoter/*sNAT1* ORF region/*LsACT1* terminator/*LsTDH3* promoter/*ACL2* DNA fragment by the *Sh ble* ORF region by PCR. The cultured cells on YPD agar plate containing 30 µg/mL nourseothricin was suspended with 100 µL of Lysing buffer containing 2% Triton X-100 and 1% SDS. The resultant cells were added 100 µL of phenol-chloroform after incubated 30 min at 70°C. After centrifugation at 15,000 × g for 5 min at room temperature, the supernatant was used as a template. PCR amplification was performed with primer set *LsLIG4*-5'UTR-out-Fw/*LsLIG4*-3'UTR-out-Rv and showed distinct bands representing different sizes 8.1, 14.3, 10.0 and 14.3 kb in  $\Delta$ *slig4*,  $\Delta$ *slig4/ACL1ACL2*, *sr22* and *sr22/ACL1ACL2*, respectively. The replacement events resulted in a 14.3-kb PCR product. F, I) genomic DNA of the indicated strains was digested with ClaI and HindIII, separated on 0.6% agarose gel, transferred to Nylon membrane (BIODYNE B), and hybridized with the amplified specific probe (5' UTR region of *LsLIG4*) using primer set *LsLIG4*-5'UTR-probe-Fw/*LsLIG4*-5'UTR-probe-Rv in a panel D and G). The *sh ble::ACL1-sNAT1-ACL2* fragment was detected by a 6.8 kb band in  $\Delta$ *slig4/ACL1ACL2*, as opposed to 9.0 kb band of the *LsLIG4* genomic DNA fragment. The *sh ble::ACL1-sNAT1-ACL2* fragment was detected by a 6.8 kb band in *sr22/ACL1ACL2*, as opposed to 5.6 kb band of the *sr22* genomic DNA fragment.



A)

Strain No.

10

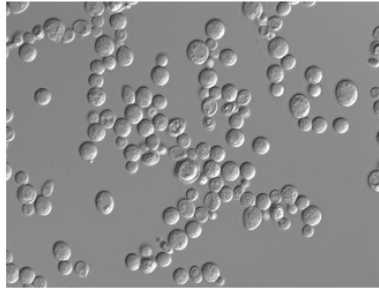

11

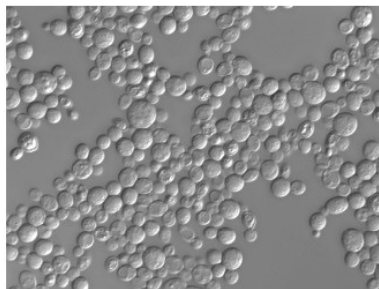

12

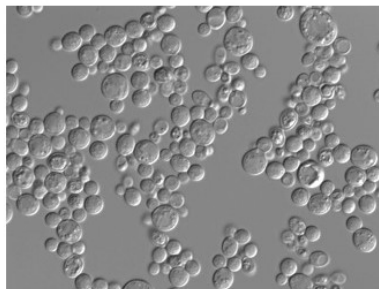

16

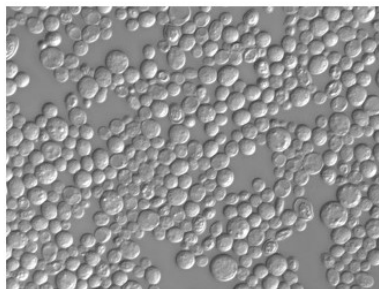

Strain No.

21

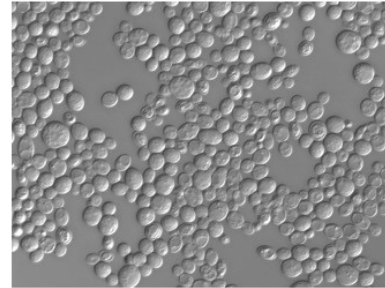

22

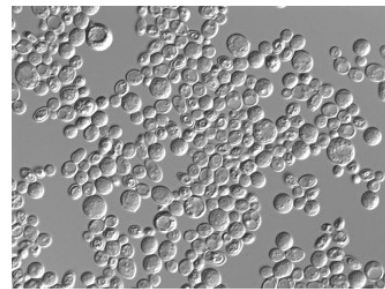

24

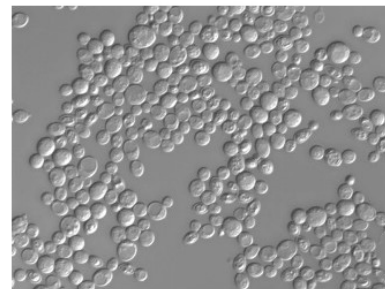

10  $\mu\text{m}$

B)

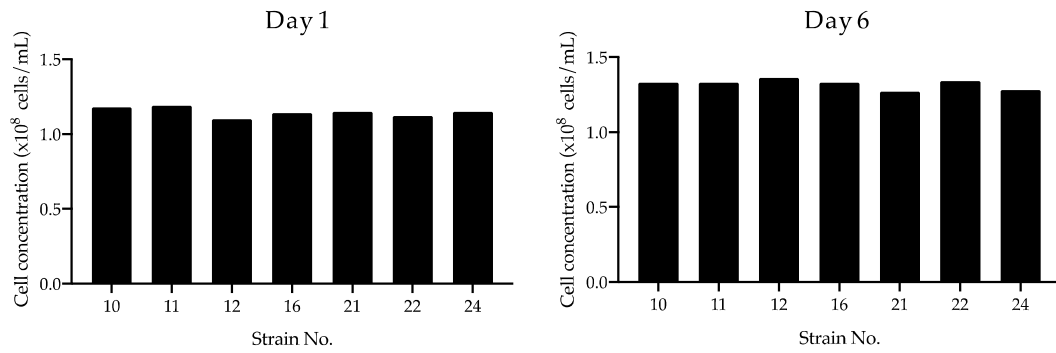

C)

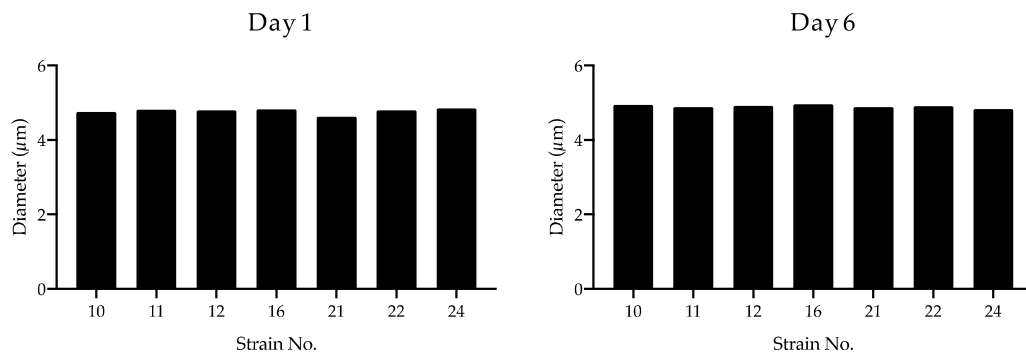

**Figure S2.** Phenotypes of mutant with greatly decreased lipid productivity strains (No. 10, 11, 12, 16, 21, 22, 24). Those mutants were cultured on S medium under large-scale cultivation condition at 30°C for six days. A) Differential interference contrast (DIC) images on day 6, B) cell concentration (cells/mL) on day 1 and 6, C) Diameter (μm) on day 1 and 6.

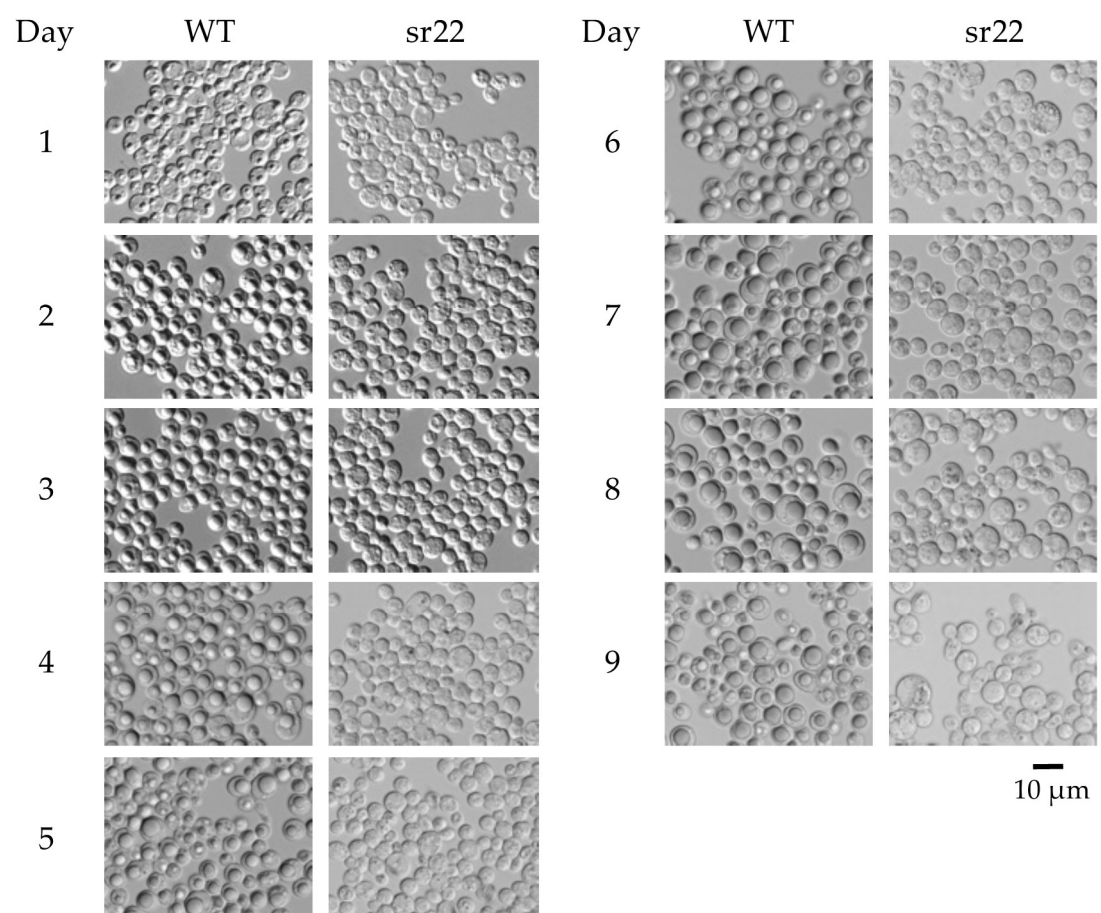

**Figure S3.** Substantial differences in DIC images of lipid droplets between wild-type (WT) strain and sr22 mutant. WT and sr22 cells were cultured on S medium under large-scale cultivation condition at 30°C for nine days.

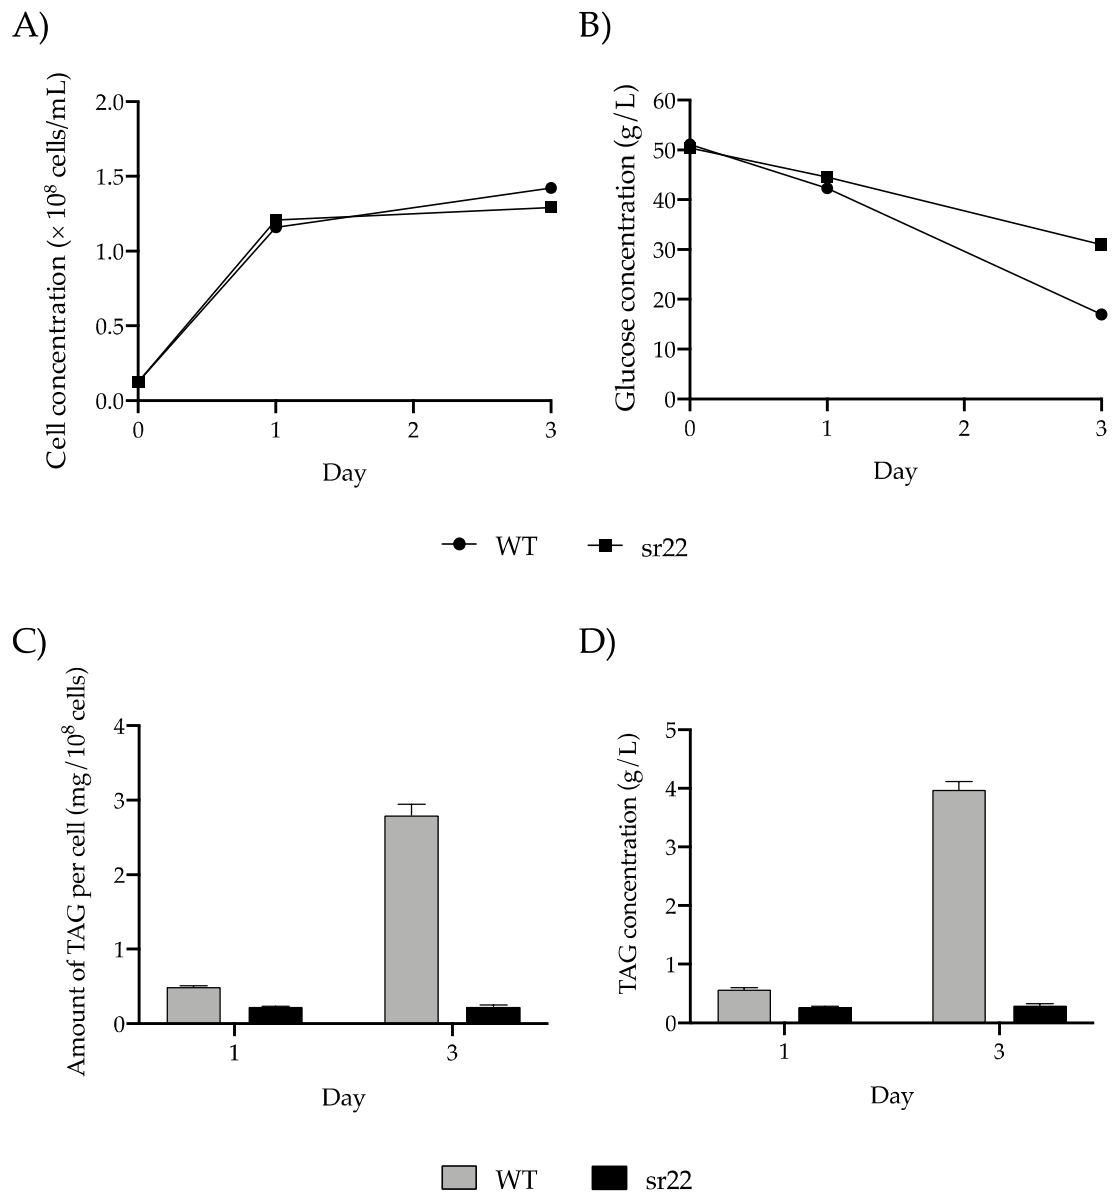

**Figure S4.** Time course analysis of cell concentration, glucose concentration, amount of TAG per cell, and TAG concentration in the wild-type (WT) strain and sr22 mutant. WT and sr22 were cultured on S medium under large-scale cultivation condition at 30°C for three days. A) cell concentration (cells/mL), B) glucose concentration (g/L), C) amount of TAG per cell (mg/ $10^8$  cells), and TAG concentration (g/L). Data are indicated as the mean  $\pm$  SEM of the three independent experiments.

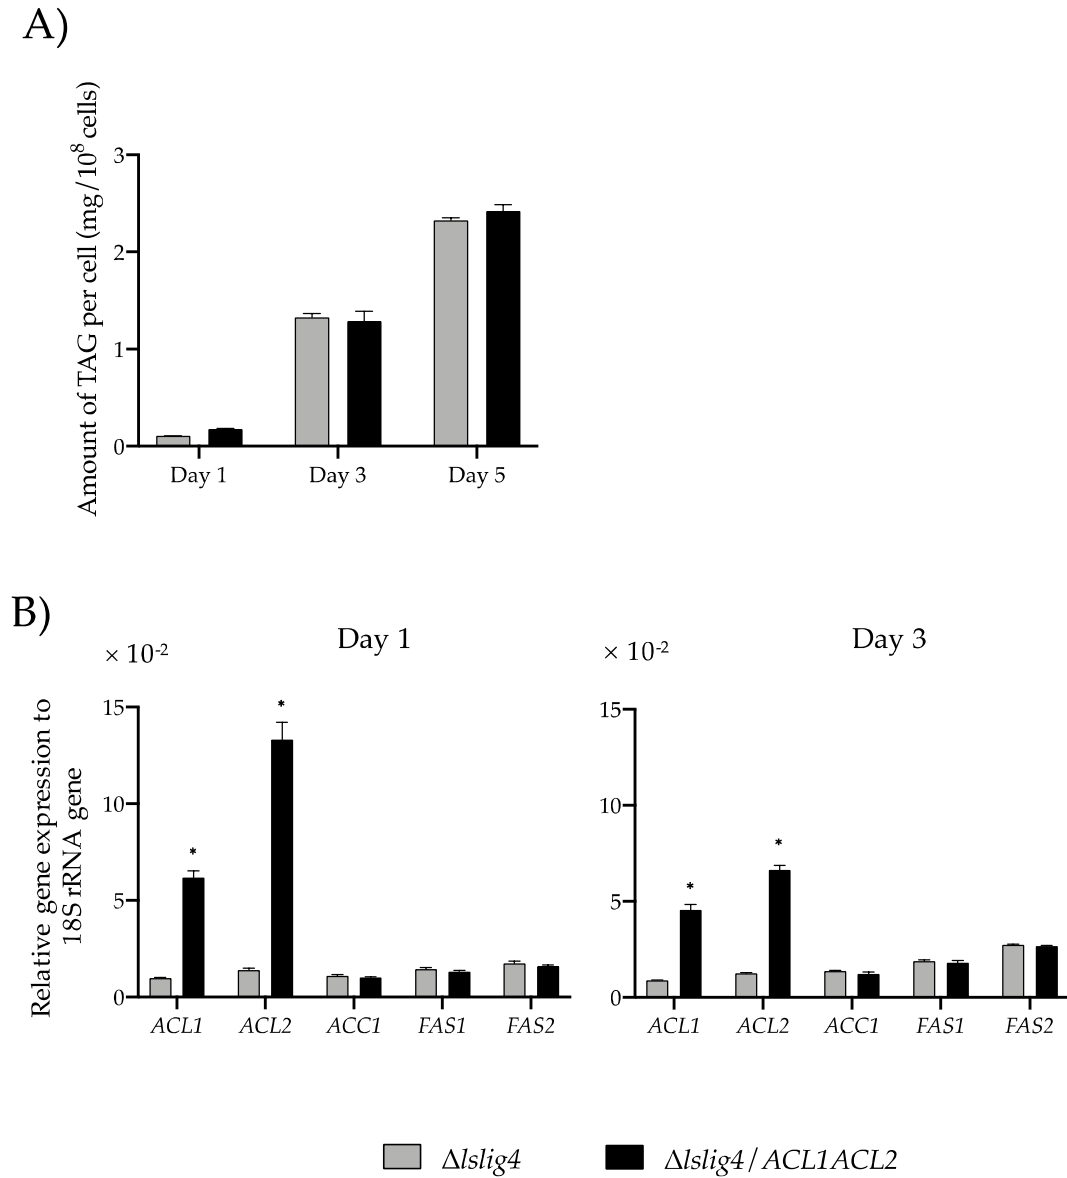

**Figure S5.** The effect of ATP-citrate lyase overexpression on TAG synthesis on an S medium containing glucose. *Δslig4* and *Δslig4/ACL1ACL2* were cultured on S medium under small-scale cultivation condition at 30°C for five days. Symbols: gray bars, *Δslig4*; black bars, *Δslig4/ACL1ACL2*. A) amount of TAG per cell (mg/10<sup>8</sup> cells), B) citrate-mediated acyl-CoA synthesis related genes. The transcription levels with relative quantitative method normalized by 18S rRNA. Data are indicated as the mean ± SEM of the three independent experiments. Asterisks indicate statistically significant differences between the *Δslig4* and *Δslig4/ACL1ACL2* (t test, \**P* < 0.05).

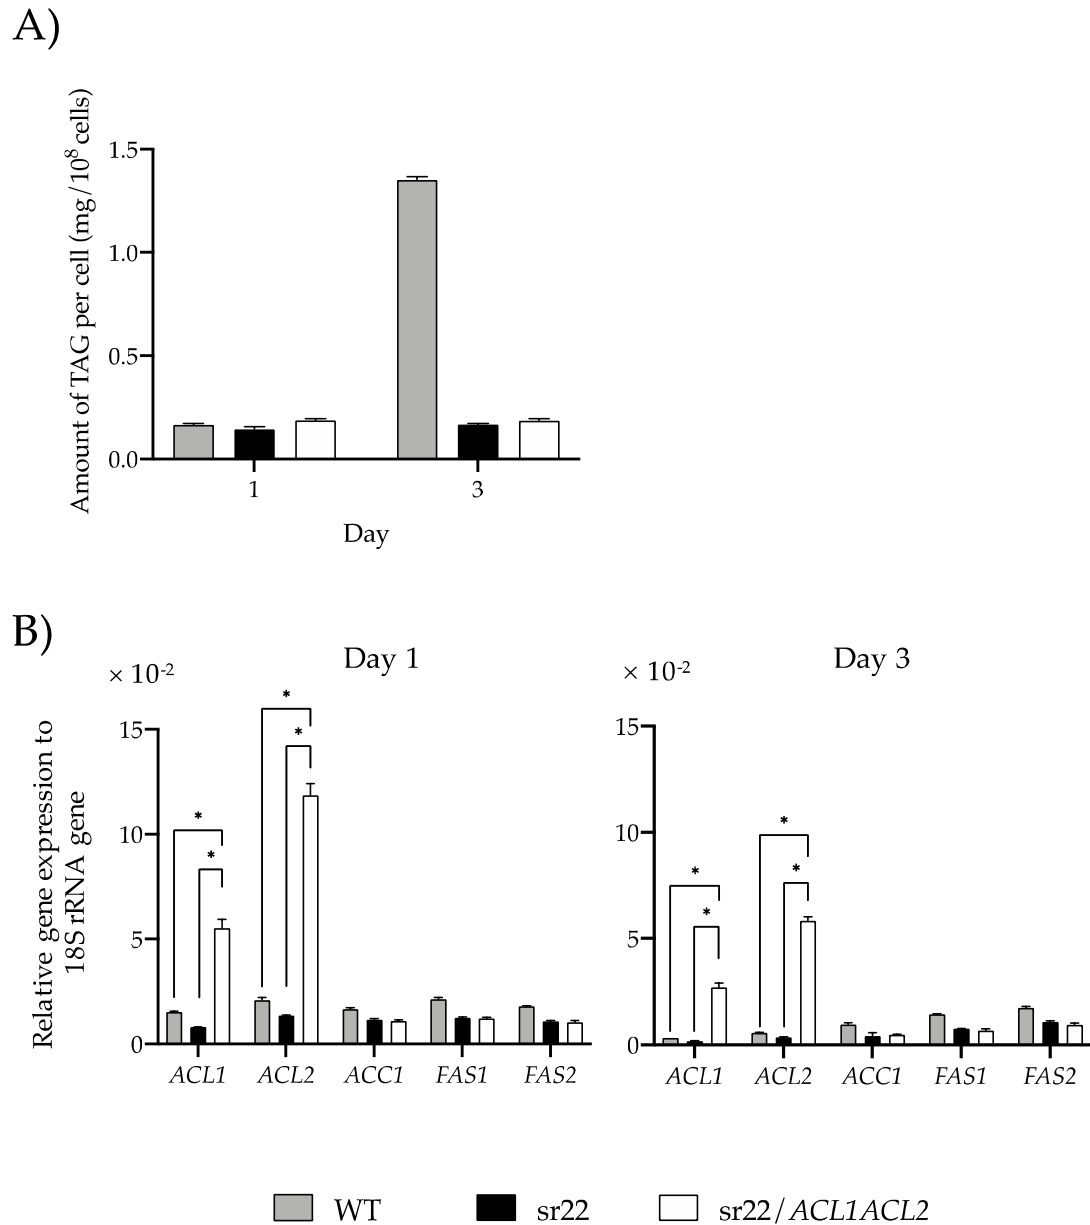

**Figure S6.** The effect of ATP-citrate lyase overexpression on TAG synthesis on an S medium containing glucose in sr22 mutant. Wild-type (WT), sr22 and sr22/*ACL1ACL2* were cultured on S medium under small-scale cultivation condition at 30°C for three days. Symbols: gray bars, WT; black bars, sr22; white bar, sr22/*ACL1ACL2*. A, B) the analysis of amount of TAG per cell (mg/10<sup>8</sup> cells) and relative expression levels of genes involved in citrate-mediated acyl-CoA synthesis was performed as described in Figure S5. Asterisks indicate statistically significant differences between the WT, sr22 and sr22/*ACL1ACL2* (t test, \**P* < 0.05).
